# Supplementary material for: Association between micronutrient powder information dissemination and caregivers' knowledge, health beliefs, and adherence in rural western China: a propensity score-matched analysis
Source: Research Square preprint supplement (doi:10.21203/rs.3.rs-6436855/v1), 2025-05-21
Supplement: Supplementary file 1 [file 565e5fc3ff44cffbe6d3fbc6.docx]

Investigator code：_______ questionnaire code：_______

Checker 1 code: _________ Checker 2 code: ___________

**Caregiver Questionnaire on Knowledge, Beliefs, and Practices Related to Micronutrient Powder (MNP)**

**Hello! We are researchers from Sichuan University. This questionnaire is mainly designed to understand how you usually feed your child. There are no right or wrong answers. Please answer according to your actual situation. Thank you for your cooperation.**

_______City/Prefecture, _______County/District,

_____ Township/Town, _____Village, ____Group

| **Basic Information** | | |
| --- | --- | --- |
|  | **Question** | **Response** |
|  | Child’s Name |  |
|  | Caregiver’s Name |  |
|  | Caregiver’s Mobile Number | |  |  |  |  |  |  |  |  |  |  |  | | --- | --- | --- | --- | --- | --- | --- | --- | --- | --- | --- | |
|  | What is your relationship to the child? | 1=Mother; 2=Father; 3=Paternal grandfather;  4=Paternal grandmother;  5=Maternal grandfather;  6=Maternal grandmother; 7=Older sister;  8=Older brother; 9=Other(please specify): ______ |

| **A** **Characteristics of the study subjects** | | | |
| --- | --- | --- | --- |
| Caregiver’s Sociodemographic Characteristic | | | |
| **serial number** | **Question** | **Option** | **Response** |
|  | Gender | 0=Female；1=Male |  |
|  | Age | ______(year) |  |
|  | Ethnicity | 1= Han； 2= Zang； 3= Yi；  4= Other(please specify): _____**______** |  |
|  | Education level | 1=No schooling;  2=Primary school;  3=Middle school;  4=High school;  5= University and above |  |
|  | Occupation | 1 = Engaged in farming;  2 = Unemployed/Taking care of the baby;  3 = Working as a migrant laborer;  4 = Self-employed individual;  5 = Professional and technical personnel (teachers, bank clerks, drivers, electricians, etc.);  6 = Grassroots staff (such as village cadres, etc.);  7 = Others, please specify _______ |  |
| Child’s Sociodemographic Characteristic | | | |
|  | Child’s Gender | 0 = Female; 1 = Male |  |
|  | Child 's Date of Birth (as shown on the birth certificate) | _____ Year ______ Month ______ Day  (If there is a birth certificate, skip to Question 10) |  |
|  | Child's Age in Months (If the date of birth has already been provided, do not ask this question) | ______ Month ______ Day |  |
| Family Characteristics | | | |
|  | Do you have a solar or electric water heater at home? | 0=No； 1=Yes |  |
|  | Do you have a washing machine at home? | 0=No； 1=Yes |  |
|  | Do you have a television at home? | 0=No； 1=Yes |  |
|  | Do you have a computer at home? | 0=No； 1=Yes |  |
|  | Can you access broadband/ Wi-Fi at home? (Not using mobile data) | 0=No； 1=Yes |  |
|  | Do you have a refrigerator at home? | 0=No； 1=Yes |  |
|  | Do you have an air conditioner at home? | 0=No； 1=Yes |  |
|  | Do you have a motorcycle/ electric bicycle at home? | 0=No； 1=Yes |  |
|  | Do you have a car/ truck at home? | 0=No； 1=Yes |  |

| **B** **Caregivers' cognition and adoption of MNP** | | | |
| --- | --- | --- | --- |
| Caregivers' Knowledge about MNP | | | |
|  | Have you ever heard of MNP? (If not, show the photo of the MNP for verification) | 0 = No; (End this part) 1 = Yes |  |
|  | Do you know what ingredients are in the MNP ?   (Multiple choices are allowed) | 0 = Don't know;  1 = Calcium;  2 = Iron;  3 = Zinc; 4 = High-quality protein;  5 = Vitamins; 6 = Others, please specify ______ |  |
|  | Do you know what is the purpose of the MNP?  (Multiple choices are allowed) | 0 = Don't know; 1 = Help the baby grow taller;  2 = Help the baby grow stronger; 3 = Prevent the baby from malnutrition;  4 = Prevent anemia; 5 = Keep the baby from getting sick;  6 = It's beneficial but the details are unclear; 7 = Others, please specify ______________ |  |
|  | How many packets of MNP should be given to your baby in a week? | packets |  |
|  | How should you feed an MNP to your baby?  (Multiple choices are allowed) | 0 = Don't know;  1 = Eat it directly without adding water; 2 = Dissolve it in boiling water;  3 = Dissolve it in warm boiled water; 4 = Consume it together with complementary foods;  5 = Mix it with milk or powdered milk; 6 = Others, please specify _____ |  |
|  | How should you store the MNP?  (Multiple choices are allowed) | 0 = Don't know; 1 = Store it in a damp place; 2 = Store it in a cool and dry place; 3 = Keep it away from being gnawed by insects and rodents; 4 = Store it in a place with sufficient sunlight; 5 = Others, please specify ______________ |  |
|  | If your child has black stools or yellow urine after taking MNP, do you think it is still okay to continue giving them MNP? | 0 = Don't know;  1 = Yes, it is okay;  2 = No, it is not okay;  3 = Make a decision depending on the situation. |  |
| Caregivers’ Perceptions and Beliefs about MNP | | | |
| Perceived Susceptibility | | | |
|  | Is it possible for a baby up to 2 years of age to be deficient in nutrients? | 0 = Don't know; 1 = Yes; 2=No |  |
|  | Is it possible for a baby up to 2 years of age to be anemic? | 0 = Don't know; 1 = Yes; 2=No |  |
| Perceived Severity | | | |
|  | If a baby is chronically undernourished, do you think it may lead to negative consequences | 1 = Very unlikely 2 = Somewhat unlikely 3 = Neutral 4 = Somewhat likely 5 = Very likely |  |
|  | If a baby is persistently anemic, do you think it could lead to negative consequences? | 1 = Very unlikely 2 = Somewhat unlikely 3 = Neutral 4 = Somewhat likely 5 = Very likely |  |
| Perceived Barriers | | | |
|  | Do you find it convenient to receive the MNPs? | 1 = Very inconvenient 2 = Somewhat inconvenient 3 = Neutral 4 = Somewhat convenient 5 = Very convenient |  |
|  | Do you think it is easy to understand how to use the MNPs? | 1 = Very difficult to understand 2 = Somewhat difficult to understand 3 = Neutral 4 = Somewhat easy to understand 5 = Very easy to understand |  |
|  | Do you find it easy to prepare the packets? | 1 = Very difficult  2 = Somewhat difficult  3 = Neutral 4 = Somewhat easy  5 = Very easy |  |
| Perceived Benefits | | | |
|  | Do you believe that using the MNP consistently will make babies grow taller or stronger? | 1 = Strongly disbelieve;  2 = Somewhat disbelieve;  3 = Neutral;  4 = Somewhat believe;  5 = Strongly believe |  |
|  | Do you believe that using the MNP consistently will prevent babies from becoming anemic? | 1 = Strongly disbelieve;  2 = Somewhat disbelieve;  3 = Neutral;  4 = Somewhat believe;  5 = Strongly believe |  |
| Self Efficacy | | | |
|  | Do you believe that you can solve a problem that arises (e.g., your child dislikes the taste) when feeding the MNP? | 1 = Strongly disbelieve;  2 = Somewhat disbelieve;  3 = Neutral;  4 = Somewhat believe;  5 = Strongly believe |  |
|  | Do you believe that you can insist on feeding the MNP to the child? | 1 = Strongly disbelieve;  2 = Somewhat disbelieve;  3 = Neutral;  4 = Somewhat believe;  5 = Strongly believe |  |
| Caregivers’ Adherence to recommended MNP feeding practices | | | |
|  | How many sachets of MNP did you feed your child in the past 7 days? | sachets |  |
|  | On average, how many sachets of MNP do you feed your baby per week? | sachets |  |

| **C. Information Dissemination of MNP** | | |
| --- | --- | --- |
|  | **Where did you obtain the information about MNP?**  (The interviewer should tick the corresponding blank.) | **What kind of information did you obtain? (Multiple choices are allowed)**  1 = It is distributed free of charge. 2 = The advantages/benefits of MNP. 3 = The feeding method of MNP. 4 = The storage method of MNP. 5 = Measures for handling the adverse reactions of MNP. 6 = Others, please specify _________ |
| A Face-to-face communication with doctors |  |  |
| B Posters and bulletin boards |  |  |
| C Pamphlets |  |  |
| D Radio |  |  |
| E Television |  |  |
| F Social media (such as WeChat, apps) |  |  |
| G family members |  |  |
| H relatives |  |  |
| I friends |  |  |
| j Others, please specify _________ |  |  |
