# Supplementary material for: Association between micronutrient powder information dissemination and caregivers' knowledge, health beliefs, and adherence in rural western China: a propensity score-matched analysis
Source: Research Square preprint supplement (doi:10.21203/rs.3.rs-6436855/v1), 2025-05-21
Supplement: Supplementary file 2 [file 977bac7ff8901c158b42a9f4.docx]

Table S1. Balancing of confounders before and after propensity score matching used in the analysis of effect of “Information channel: doctors”.

| Potential confounder | Mean in treated | Mean in untreated | Standardized difference | | *P* |
| --- | --- | --- | --- | --- | --- |
| Before matching | After matching |
| Child’s sex | 0.53 | 0.56 | 0.063 | -0.055 | 0.344 |
| Child’s age(months) | 18.28 | 18.11 | -0.136 | 0.029 | 0.626 |
| Caregiver’s gender | 0.09 | 0.09 | -0.145 | 0.005 | 0.919 |
| Caregiver’s ethnicity | 1.86 | 1.78 | 0.357 | 0.105 | 0.079 |
| Caregiver’s generation | 0.66 | 0.67 | 0.478 | -0.029 | 0.618 |
| Caregiver’s education level | 2.07 | 2.11 | -0.267 | -0.038 | 0.551 |
| Caregiver’s occupation | 2.36 | 2.27 | 0.14 | 0.141 | 0.02 |
| Household assets level | 2.61 | 2.64 | -0.323 | -0.024 | 0.69 |

Table S2. Balancing of confounders before and after propensity score matching used in the analysis of effect of “Information channel: mass media”.

| Potential confounder | Mean in treated | Mean in untreated | Standardized difference | | *P* |
| --- | --- | --- | --- | --- | --- |
| Before matching | After matching |
| Child’s sex | 0.46 | 0.49 | -0.16 | -0.066 | 0.658 |
| Child’s age(months) | 18.25 | 17.46 | 0.024 | 0.146 | 0.335 |
| Caregiver’s gender | 0.05 | 0.07 | -0.199 | -0.041 | 0.757 |
| Caregiver’s ethnicity | 1.49 | 1.57 | -0.734 | -0.099 | 0.494 |
| Caregiver’s generation | 0.88 | 0.88 | 0.53 | 0 | 1 |
| Caregiver’s education level | 2.68 | 2.89 | 0.881 | -0.203 | 0.184 |
| Caregiver’s occupation | 2.45 | 2.49 | 0.266 | -0.062 | 0.69 |
| Household assets level | 3.05 | 3.07 | 0.658 | -0.011 | 0.94 |
| Information channel: doctors | 0.96 | 0.96 | 0.199 | 0 | 1 |
| Information channel: wider community | 0.41 | 0.35 | 0.395 | 0.117 | 0.448 |
| Information content: MNP is free | 0.63 | 0.63 | 0.345 | 0 | 1 |
| Information content: MNP benefits | 0.78 | 0.79 | 0.329 | -0.025 | 0.858 |
| Information content: MNP feeding method | 0.57 | 0.62 | 0.177 | -0.088 | 0.549 |
| Information content: MNP storage method | 0.27 | 0.29 | 0.331 | -0.026 | 0.87 |
| Information content:  Responding to abnormal reactions | 0.15 | 0.20 | 0.299 | -0.132 | 0.439 |

Table S3. Balancing of confounders before and after propensity score matching used in the analysis of effect of “Information Channel: wider community”.

| Potential confounder | Mean in treated | Mean in untreated | Standardized difference | | *P* |
| --- | --- | --- | --- | --- | --- |
| Before matching | After matching |
| Child’s sex | 0.53 | 0.54 | -0.017 | -0.016 | 0.858 |
| Child’s age(months) | 18.16 | 17.93 | -0.043 | 0.042 | 0.619 |
| Caregiver’s gender | 0.09 | 0.09 | -0.041 | -0.014 | 0.876 |
| Caregiver’s ethnicity | 1.71 | 1.69 | -0.453 | 0.029 | 0.742 |
| Caregiver’s generation | 0.73 | 0.75 | 0.09 | -0.044 | 0.611 |
| Caregiver’s education level | 2.22 | 2.3 | 0.368 | -0.076 | 0.418 |
| Caregiver’s occupation | 2.42 | 2.42 | 0.221 | 0 | 1 |
| Household assets level | 2.75 | 2.64 | 0.314 | 0.104 | 0.237 |
| Information channel: doctors | 0.87 | 0.87 | -0.303 | 0 | 1 |
| Information channel: mess media | 0.16 | 0.11 | 0.267 | 0.135 | 0.149 |
| Information content: MNP is free | 0.53 | 0.5 | 0.145 | 0.065 | 0.473 |
| Information content: MNP benefits | 0.72 | 0.69 | 0.156 | 0.052 | 0.555 |
| Information content: MNP feeding method | 0.5 | 0.51 | -0.052 | -0.008 | 0.929 |
| Information content: MNP storage method | 0.18 | 0.19 | -0.058 | -0.031 | 0.728 |
| Information content:  Responding to abnormal reactions | 0.1 | 0.13 | 0.096 | -0.109 | 0.265 |

Table S4. Balancing of confounders before and after propensity score matching used in the analysis of effect of “Information content: MNP is free”.

| Potential confounder | Mean in treated | Mean in untreated | Standardized difference | | *P* |
| --- | --- | --- | --- | --- | --- |
| Before matching | After matching |
| Child’s sex | 0.54 | 0.55 | 0.048 | -0.02 | 0.777 |
| Child’s age(months) | 18.16 | 18.78 | -0.026 | -0.112 | 0.12 |
| Caregiver’s gender | 0.09 | 0.13 | 0 | -0.118 | 0.114 |
| Caregiver’s ethnicity | 1.91 | 1.92 | -0.278 | -0.015 | 0.832 |
| Caregiver’s generation | 0.7 | 0.76 | 0.087 | -0.115 | 0.094 |
| Caregiver’s education level | 2.04 | 2.05 | 0.289 | -0.01 | 0.897 |
| Caregiver’s occupation | 2.34 | 2.28 | 0.014 | 0.089 | 0.228 |
| Household assets level | 2.6 | 2.63 | 0.258 | -0.032 | 0.654 |
| Information channel: doctors | 0.96 | 0.97 | 0.375 | -0.028 | 0.543 |
| Information channel: mess media | 0.12 | 0.14 | 0.209 | -0.041 | 0.598 |
| Information channel: wider community | 0.29 | 0.25 | 0.129 | 0.09 | 0.203 |
| Information content: MNP benefits | 0.68 | 0.67 | 0.092 | 0.016 | 0.821 |
| Information content: MNP feeding method | 0.58 | 0.56 | 0.437 | 0.026 | 0.721 |
| Information content: MNP storage method | 0.22 | 0.21 | 0.509 | 0.032 | 0.668 |
| Information content:  Responding to abnormal reactions | 0.09 | 0.08 | 0.368 | 0.053 | 0.441 |

Table S5. Balancing of confounders before and after propensity score matching used in the analysis of effect of “Information content: MNP benefits”.

| Potential confounder | Mean in treated | Mean in untreated | Standardized difference | | *P* |
| --- | --- | --- | --- | --- | --- |
| Before matching | After matching |
| Child’s sex | 0.52 | 0.54 | -0.031 | -0.045 | 0.46 |
| Child’s age(months) | 18.16 | 18.28 | -0.026 | -0.02 | 0.739 |
| Caregiver’s gender | 0.08 | 0.08 | -0.074 | 0.006 | 0.911 |
| Caregiver’s ethnicity | 2.02 | 2.01 | -0.128 | 0.009 | 0.883 |
| Caregiver’s generation | 0.72 | 0.74 | 0.05 | -0.053 | 0.368 |
| Caregiver’s education level | 1.91 | 1.87 | 0.022 | 0.043 | 0.482 |
| Caregiver’s occupation | 2.34 | 2.27 | -0.042 | 0.104 | 0.088 |
| Household assets level | 2.47 | 2.47 | 0.055 | 0.002 | 0.978 |
| Information channel: doctors | 0.98 | 0.98 | 0.564 | 0 | 1 |
| Information channel: mess media | 0.09 | 0.11 | 0.212 | -0.058 | 0.351 |
| Information channel: wider community | 0.26 | 0.31 | 0.148 | -0.112 | 0.076 |
| Information content: MNP is free | 0.48 | 0.45 | 0.098 | 0.049 | 0.423 |
| Information content: MNP feeding method | 0.5 | 0.5 | 0.294 | 0 | 1 |
| Information content: MNP storage method | 0.15 | 0.09 | 0.452 | 0.188 | 0.001 |
| Information content:  Responding to abnormal reactions | 0.06 | 0.05 | 0.295 | 0.029 | 0.601 |

Table S6. Balancing of confounders before and after propensity score matching used in the analysis of effect of “Information content: feeding method”.

| Potential confounder | Mean in treated | Mean in untreated | Standardized difference | | *P* |
| --- | --- | --- | --- | --- | --- |
| Before matching | After matching |
| Child’s sex | 0.53 | 0.53 | -0.021 | 0.007 | 0.936 |
| Child’s age(months) | 17.89 | 17.69 | -0.107 | 0.037 | 0.658 |
| Caregiver’s gender | 0.09 | 0.06 | 0 | 0.088 | 0.221 |
| Caregiver’s ethnicity | 2.08 | 2.03 | 0.007 | 0.062 | 0.445 |
| Caregiver’s generation | 0.71 | 0.75 | 0.07 | -0.078 | 0.317 |
| Caregiver’s education level | 1.8 | 1.86 | -0.009 | -0.055 | 0.472 |
| Caregiver’s occupation | 2.33 | 2.36 | -0.006 | -0.043 | 0.565 |
| Household assets level | 2.43 | 2.45 | 0.001 | -0.012 | 0.885 |
| Information channel: doctors | 0.98 | 0.98 | 0.457 | 0 | 1 |
| Information channel: mess media | 0.08 | 0.12 | 0.109 | -0.106 | 0.181 |
| Information channel: wider community | 0.25 | 0.23 | -0.046 | 0.044 | 0.57 |
| Information content: MNP is free | 0.66 | 0.64 | 0.276 | 0.042 | 0.612 |
| Information content: MNP benefits | 0.49 | 0.54 | 0.437 | -0.1 | 0.227 |
| Information content: MNP storage method | 0.06 | 0.06 | 1.023 | 0 | 1 |
| Information content:  Responding to abnormal reactions | 0.02 | 0.01 | 0.505 | 0.024 | 0.477 |

Table S7. Balancing of confounders before and after propensity score matching used in the analysis of effect of “Information content: storage method”.

| Potential confounder | Mean in treated | Mean in untreated | Standardized difference | | *P* |
| --- | --- | --- | --- | --- | --- |
| Before matching | After matching |
| Child’s sex | 0.48 | 0.55 | -0.101 | -0.123 | 0.323 |
| Child’s age(months) | 18.05 | 18.77 | 0.015 | -0.132 | 0.298 |
| Caregiver’s gender | 0.12 | 0.08 | 0.071 | 0.101 | 0.41 |
| Caregiver’s ethnicity | 1.86 | 1.88 | -0.257 | -0.018 | 0.887 |
| Caregiver’s generation | 0.69 | 0.68 | 0.01 | 0.017 | 0.894 |
| Caregiver’s education level | 2.09 | 2.13 | 0.331 | -0.035 | 0.782 |
| Caregiver’s occupation | 2.32 | 2.3 | -0.033 | 0.032 | 0.792 |
| Household assets level | 2.56 | 2.68 | 0.09 | -0.106 | 0.399 |
| Information channel: doctors | 0.98 | 1 | 0.399 | -0.068 | 0.157 |
| Information channel: mess media | 0.15 | 0.08 | 0.255 | 0.229 | 0.053 |
| Information channel: wider community | 0.24 | 0.27 | -0.065 | -0.07 | 0.57 |
| Information content: MNP is free | 0.82 | 0.83 | 0.55 | -0.036 | 0.746 |
| Information content: MNP benefits | 0.97 | 0.95 | 1.566 | 0.063 | 0.357 |
| Information content: MNP feeding method | 0.65 | 0.71 | 0.67 | -0.115 | 0.354 |
| Information content:  Responding to abnormal reactions | 0.1 | 0.17 | 0.842 | -0.194 | 0.103 |

Table S8. Balancing of confounders before and after propensity score matching used in the analysis of effect of “Information content: responding to abnormal reactions”.

| Potential confounder | Mean in treated | Mean in untreated | Standardized difference | | *P* |
| --- | --- | --- | --- | --- | --- |
| Before matching | After matching |
| Child’s sex | 0.52 | 0.52 | 0.024 | 0 | 1 |
| Child’s age(months) | 18.06 | 18.31 | -0.041 | -0.048 | 0.754 |
| Caregiver’s gender | 0.08 | 0.06 | -0.095 | 0.046 | 0.756 |
| Caregiver’s ethnicity | 1.7 | 1.61 | -0.476 | 0.106 | 0.482 |
| Caregiver’s generation | 0.71 | 0.65 | 0.002 | 0.141 | 0.398 |
| Caregiver’s education level | 2.37 | 2.3 | 0.488 | 0.057 | 0.729 |
| Caregiver’s occupation | 2.37 | 2.51 | 0.106 | -0.196 | 0.241 |
| Household assets level | 2.72 | 2.85 | 0.302 | -0.112 | 0.463 |
| Information channel: doctors | 1 | 1 | 0 | 0 | - |
| Information channel: mess media | 0.18 | 0.22 | 0.305 | -0.106 | 0.551 |
| Information channel: wider community | 0.32 | 0.32 | 0.202 | 0 | 1 |
| Information content: MNP is free | 0.85 | 0.9 | 0.404 | -0.124 | 0.342 |
| Information content: MNP benefits | 0.89 | 0.86 | 0.936 | 0.061 | 0.635 |
| Information content: MNP feeding method | 0.68 | 0.7 | 1.351 | -0.031 | 0.865 |
| Information content: MNP storage method | 0.75 | 0.68 | 0.626 | 0.136 | 0.381 |

Table S9. Balancing of confounders of propensity score matching after varying matching ratios and caliper values

| Potential confounder | Standardized difference After matching | | | | | | | | |
| --- | --- | --- | --- | --- | --- | --- | --- | --- | --- |
| Channel | | |  | Content | | | | |
| doctors | mass media | wider community |  | free | benefits | feeding method | storage method | response to abnormal reactions |
| Child’s sex | -0.075 | 0.013 | 0.021 |  | 0.021 | 0 | 0.072 | 0.021 | 0.061 |
| Child’s age(months) | 0.1178 | 0.161 | 0.056 |  | 0.056 | -0.005 | 0.047 | 0.029 | 0.022 |
| Caregiver’s gender | 0.052 | -0.024 | -0.007 |  | -0.007 | -0.021 | 0.035 | 0.093 | 0.165 |
| Caregiver’s ethnicity | 0.143 | -0.041 | 0.005 |  | 0.005 | -0.02 | 0.029 | 0.029 | 0.055 |
| Caregiver’s generation | -0.009 | -0.016 | -0.07 |  | -0.07 | -0.071 | -0.068 | -0.083 | -0.101 |
| Caregiver’s education level | -0.034 | -0.19 | -0.09 |  | -0.09 | 0.031 | -0.086 | -0.026 | 0.055 |
| Caregiver’s occupation | 0.113 | -0.124 | -0.038 |  | -0.038 | 0.072 | 0 | -0.005 | -0.17 |
| Household assets level | -0.056 | -0.062 | 0.115 |  | 0.115 | 0.059 | -0.038 | 0 | -0.107 |
| Information channel: doctors | — | 0.052 | -0.042 |  | -0.042 | 0.007 | 0 | 0 | 0 |
| Information channel: mass media | — | — | 0.083 |  | 0.083 | -0.065 | -0.045 | -0.09 | -0.253 |
| Information channel: wider community | — | 0.054 | — |  | 0.038 | -0.064 | 0.039 | 0.031 | -0.067 |
| Information content: MNP is free | — | 0.09 | 0.038 |  | — | 0.021 | 0.041 | 0.081 | -0.111 |
| Information content: benefits | — | 0.057 | 0.046 |  | 0.046 | — | -0.064 | -0.056 | 0.073 |
| Information content: feeding method | — | -0.013 | -0.042 |  | -0.042 | -0.089 | — | 0 | -0.037 |
| Information content: storage method | — | 0.133 | -0.011 |  | -0.011 | 0.11 | 0 | — | 0.163 |
| Information content: responding to abnormal reactions | — | -0.038 | -0.071 |  | -0.071 | -0.028 | 0.012 | 0.012 | — |

Table S10. Result of regression analysis in sensitivity analysis.

| Independent variable | Outcome | | |
| --- | --- | --- | --- |
| RCK | RHB | AMP |
| *β*(95%*CI*) | *β*(95%*CI*) | *OR*(95%*CI*) |
| Channel-doctors (N=655) | **0.79(0.46-1.11)***** | **1.11(0.01-2.22)***** | **0.86(0.23-1.50)***** |
|  |
| Channel-mass media (N=938) | **0.54(0.20-0.88)**** | **2.02(0.82-3.22)**** | 0.82 (0.38-1.74) |  |
|  |
| Channel-wider community (N=935) | **0.36(0.16-0.57)*** | **0.92(0.21-1.64)*** | 1.45 (0.97-2.16) |  |
|  |
| Content-free (N=893) | -0.06(-0.24-0.12) | -0.36 (-0.98-0.25) | 0.73 (0.52-1.03) |  |
|  |
| Content-benefits (N=841) | **0.64(0.46-0.83)***** | **1.38(0.73-2.04)***** | **1.55(1.07-2.25)*** |  |
|  |
| Content-feeding method (N=770) | **0.21(0.02-0.40)*** | **1.60(0.93-2.28)***** | **1.73(1.17-2.55)*** |  |
|  |
| Content-storage method (N=894) | -0.47(-1.40-0.47) | 0.91 (-0.51-1.62) | 0.91 (0.51-1.62) |  |
|  |
| Content-response to abnormal reactions (N=861) | 0.13(-0.29-0.55) | 1.34 (-0.02-2.71) | 1.93 (0.61-6.12) |  |
|  |
|  |

Note: RCK = MNP-related core knowledge; RHB = MNP-related health beliefs; AMP = Adherence to recommended MNP feeding practices.
